# Supplementary material for: Dissecting the single-cell transcriptome network underlying esophagus non-malignant tissues and esophageal squamous cell carcinoma
Source: PubMed Central journal article supplement — eBioMedicine. 2021 Jun 27;69:103459. doi: 10.1016/j.ebiom.2021.103459 (PMC8253912; doi:10.1016/j.ebiom.2021.103459), 2021-06-27
Supplement: mmc5.pdf [file mmc5.pdf]

## SPINK5 Antibody

Cat.#: DF4462  
Size: 50ul,100ul,200ul

Concn.: 1mg/ml  
Source: Rabbit

Mol.Wt.: 121 KD  
Clonality: Polyclonal

**Application:** WB 1:500-1:1000, IF/ICC 1:100-1:500, IHC 1:50-1:200, ELISA(peptide) 1:20000-1:40000  
\*The optimal dilutions should be determined by the end user.

**Reactivity:** Human,Mouse

**Purification:** The antiserum was purified by peptide affinity chromatography using SulfoLink™ Coupling Resin (Thermo Fisher Scientific).

**Specificity:** SPINK5 Antibody detects endogenous levels of total SPINK5.

**Immunogen:** A synthesized peptide derived from human SPINK5, corresponding to a region within N-terminal amino acids.

**Uniprot:** Q9NQ38

**Storage Condition and Buffer:** Rabbit IgG in phosphate buffered saline , pH 7.4, 150mM NaCl, 0.02% sodium azide and 50% glycerol.Store at -20 °C.Stable for 12 months from date of receipt.

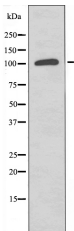

Western blot analysis of extracts from NIH/3T3 cells using SPINK5 antibody.

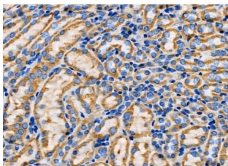

DF4462 at 1/100 staining Mouse kidney tissue by IHC-P. The sample was formaldehyde fixed and a heat mediated antigen retrieval step in citrate buffer was performed. The sample was then blocked and incubated with the primary antibody at 4°C overnight. An HRP conjugated anti-Rabbit antibody was used as the secondary antibody.

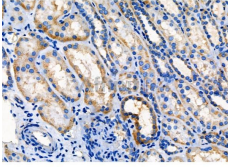

DF4462 at 1/100 staining Human kidney cancer and adjacent normal tissues by IHC-P. The sample was formaldehyde fixed and a heat mediated antigen retrieval step in citrate buffer was performed. The sample was then blocked and incubated with the primary antibody at 4°C overnight. An HRP conjugated anti-Rabbit antibody was used as the secondary antibody.

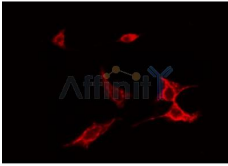

DF4462 staining NIH-3T3 cells by IF/ICC. The sample were fixed with PFA and permeabilized in 0.1% Triton X-100, then blocked in 10% serum for 45 minutes at 25°C. The primary antibody was diluted at 1/200 and incubated with the sample for 1 hour at 37°C. An Alexa Fluor 594 conjugated goat anti-rabbit IgG (H+L) antibody (Red), diluted at 1/600, was used as secondary antibody.

**IMPORTANT:** For western blot, incubate membrane with diluted primary Ab in 5% w/v milk , 1X TBS, 0.1% Tween@20 at 4°C with gentle shaking, overnight.

For Research Use Only. Not for use in diagnostic and therapeutic procedures. Not for resale without express authorization.
