# Supplementary material for: Dissecting the single-cell transcriptome network underlying esophagus non-malignant tissues and esophageal squamous cell carcinoma
Source: PubMed Central journal article supplement — eBioMedicine. 2021 Jun 27;69:103459. doi: 10.1016/j.ebiom.2021.103459 (PMC8253912; doi:10.1016/j.ebiom.2021.103459), 2021-06-27
Supplement: mmc7.pdf [file mmc7.pdf]

## IGFBP2 Antibody

Cat.#: DF7765  
Size: 50ul,100ul,200ul

Concn.: 1mg/ml  
Source: Rabbit

Mol.Wt.: 35 kDa  
Clonality: Polyclonal

|                               |                                                                                                                                                              |
|-------------------------------|--------------------------------------------------------------------------------------------------------------------------------------------------------------|
| Application:                  | WB 1:1000-3000, IF/ICC 1:100-1:500, IHC 1:50-1:200, ELISA(peptide) 1:20000-1:40000<br>*The optimal dilutions should be determined by the end user.           |
| Reactivity:                   | Human                                                                                                                                                        |
| Purification:                 | The antiserum was purified by peptide affinity chromatography using SulfoLink™ Coupling Resin (Thermo Fisher Scientific).                                    |
| Specificity:                  | IGFBP2 Antibody detects endogenous levels of total IGFBP2.                                                                                                   |
| Immunogen:                    | A synthesized peptide derived from human IGFBP2, corresponding to a region within C-terminal amino acids.                                                    |
| Uniprot:                      | P18065                                                                                                                                                       |
| Storage Condition and Buffer: | Rabbit IgG in phosphate buffered saline , pH 7.4, 150mM NaCl, 0.02% sodium azide and 50% glycerol.Store at -20 °C.Stable for 12 months from date of receipt. |

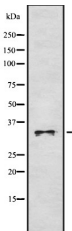

Western blot analysis of IGFBP2 using Jurkat whole lysates.

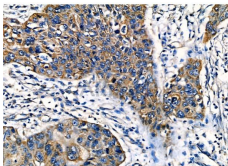

DF7765 at 1/100 staining Human esophageal cancer by IHC-P. The sample was formaldehyde fixed and a heat mediated antigen retrieval step in citrate buffer was performed. The sample was then blocked and incubated with the primary antibody at 4°C overnight. An HRP conjugated anti-Rabbit antibody was used as the secondary antibody.

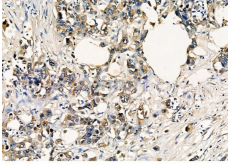

DF7765 at 1/100 staining Human gastric cancer by IHC-P. The sample was formaldehyde fixed and a heat mediated antigen retrieval step in citrate buffer was performed. The sample was then blocked and incubated with the primary antibody at 4°C overnight. An HRP conjugated anti-Rabbit antibody was used as the secondary antibody.

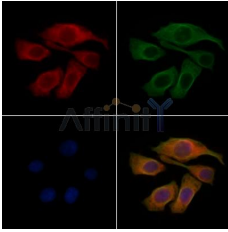

DF7765 staining HeLa cells by IF/ICC. The samples were fixed with PFA and permeabilized in 0.1% Triton X-100, then blocked in 10% serum for 45 minutes at 25°C. Samples were then incubated with primary Ab(DF7765 1:200) and mouse anti-beta tubulin Ab(T0023 1:200) for 1 hour at 37°C. An AlexaFluor594 conjugated goat anti-rabbit IgG(H+L) Ab(Red) and an AlexaFluor488 conjugated goat anti-mouse IgG(H+L) Ab(Green) were used as the secondary antibody.

**IMPORTANT:** For western blot, incubate membrane with diluted primary Ab in 5% w/v milk , 1X TBS, 0.1% Tween@20 at 4°C with gentle shaking, overnight.

For Research Use Only. Not for use in diagnostic and therapeutic procedures. Not for resale without express authorization.
